# Supplementary material for: Novel Linear Trinuclear CuII Compound with Trapped Chiral Hemiaminal Ligand: Magnetostructural Study
Source: MDPI journal article supplement (doi:10.3390/magnetochemistry9070175), 2023-07-06
Supplement: s1 [file s1]

*Supplementary Information*

# **Novel Linear Trinuclear Cu<sup>II</sup> Compound with Trapped Chiral Hemiaminal Ligand: Magnetostructural Study**

**Carlos Cruz<sup>1,2\*</sup>, Nathalie Audebrand,<sup>3</sup> Dayan Paez,<sup>4</sup> Verónica Paredes-García<sup>1,2\*</sup>**

<sup>1</sup> Universidad Andrés Bello, Facultad de Ciencias Exactas, Departamento de Ciencias Químicas, Santiago, Chile.

<sup>2</sup> CEDENNA, Santiago, Chile.

<sup>3</sup> Univ Rennes, CNRS, INSA Rennes, ISCR (Institut des Sciences Chimiques de Rennes) - UMR 6226, F-35000 Rennes, France

<sup>4</sup> Universidad Andres Bello, Departamento de Ciencias Químicas and Center of Applied Nanosciences (CANS), Santiago, Chile.

\* Correspondance: c.cruzherrera@uandresbello.edu (C.C.); vparedes@unab.cl (V.P-G).

### 1. Synthetical procedure and supplementary analysis

The trinuclear complex is very soluble in methanol and acetonitrile. Several attempts were made to accelerate the crystallization using layering and vapor diffusion with tetrahydrofuran, chloroform, and diethyl ether as antisolvent without success.

The infrared spectra of **1** show broadband between 1130 and 948  $\text{cm}^{-1}$  and 995  $\text{cm}^{-1}$  characteristics of the  $\text{ClO}_4^-$  ion (Figure S1b).

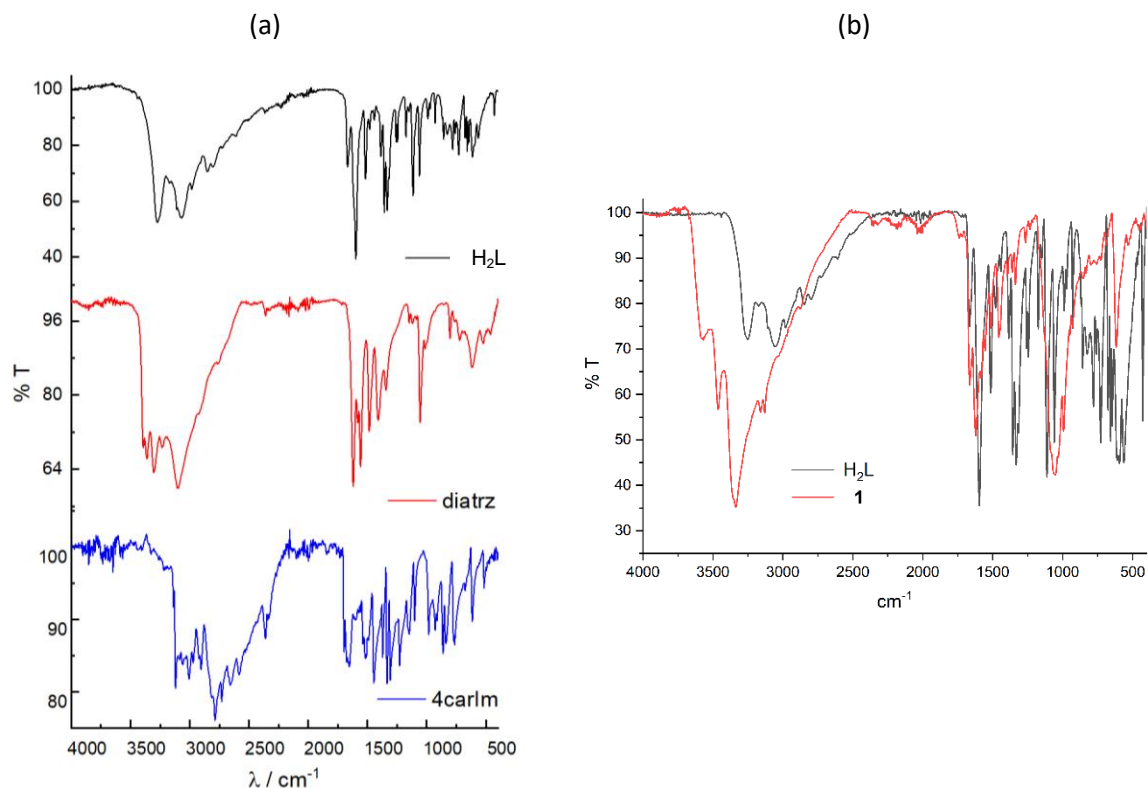

Figure S1. (a) Spectra of H<sub>2</sub>L ligand (black) diatrz (red) and 4carlm (blue). (b) Spectra of H<sub>2</sub>L (black) and of **1** (red).

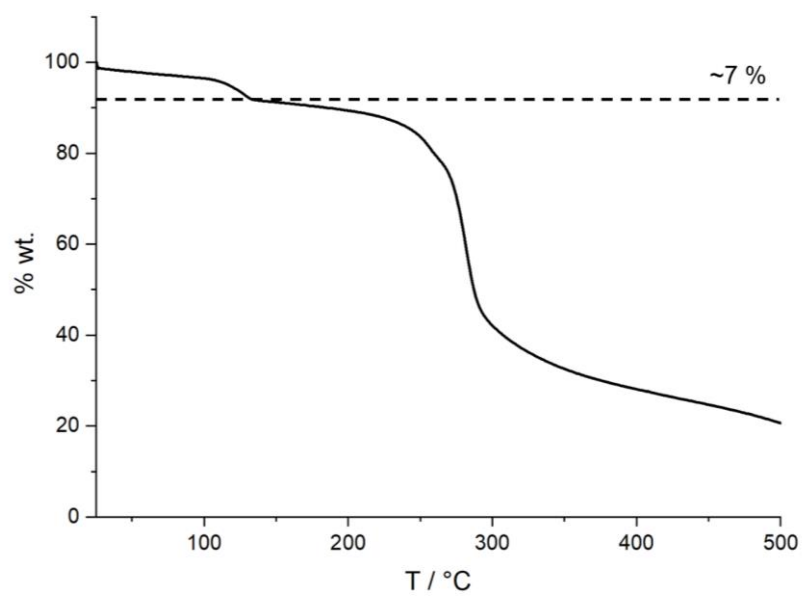

Figure S2. Thermogram in N<sub>2</sub> atmosphere of compound **1**.

WDICVOL04 solution (Automatic generated PCR file) Chi2: 20.2546

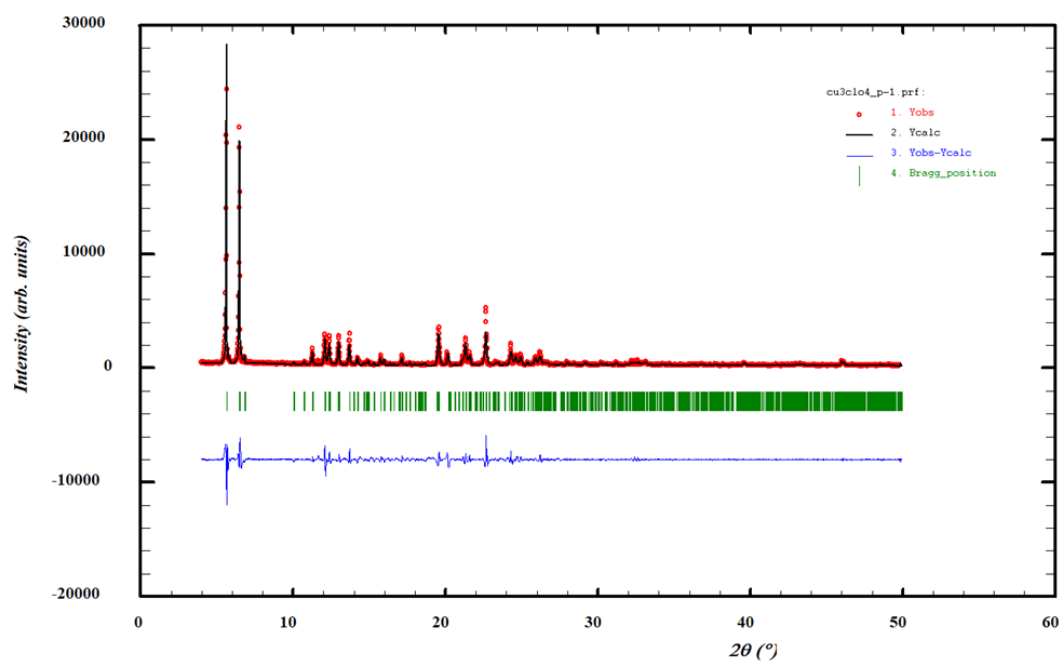

**Refined unit-cell in P-1:**

$a = 7.38553$  (0.00036)  
 $b = 14.71983$  (0.00073)  
 $c = 17.13576$  (0.00127)  
 $\alpha = 110.25927$  (0.00595)  
 $\beta = 99.78921$  (0.00918)  
 $\gamma = 95.57783$  (0.00880)

Rp: 13.5  
 Rwp: 20.8  
 Rexp: 4.63  
 Chi2: 20.3

Figure S3. Le Bail fit of the X-ray powder diffraction patterns of powder sample of **1**. The powder pattern fittings by pattern-matching with the Le Bail fit is possible to determine that the experimental XRPD of **1** agree with the calculated pattern generated by the SC-XRD data.

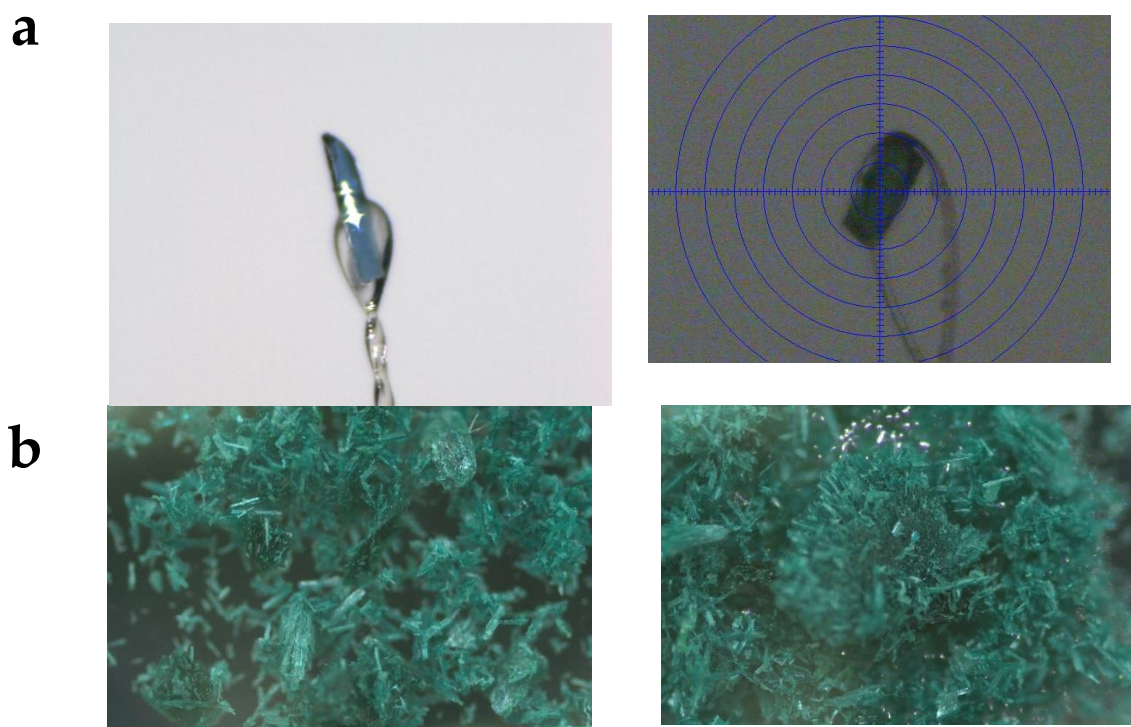

Figure S4. (a) Crystal of **1** used for X-ray Crystal Structure Analysis and (b) bulk crystalline sample used for characterization.

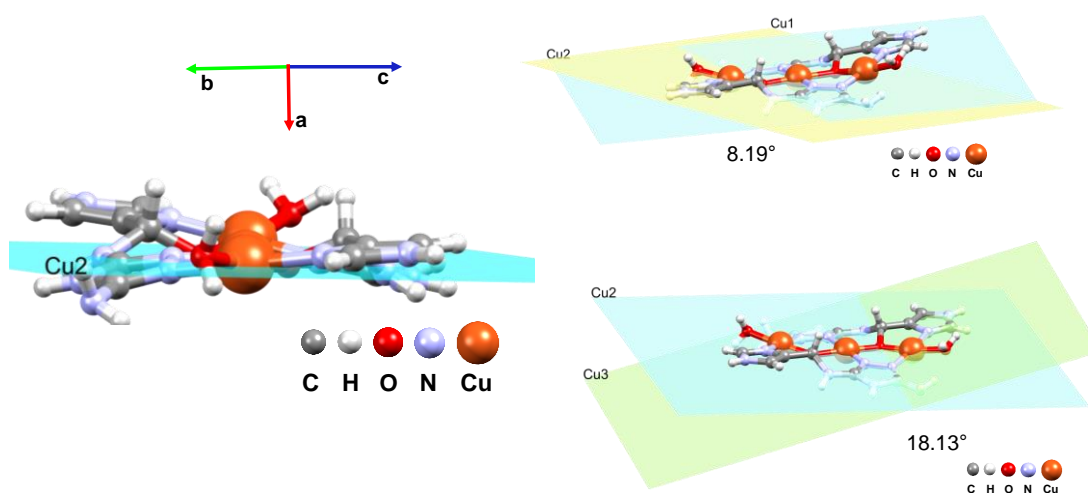

Figure S5. view of Cu1-Cu2-Cu3 linear core in compound **1**; Cu1/Cu2 and Cu2/Cu3 planes.

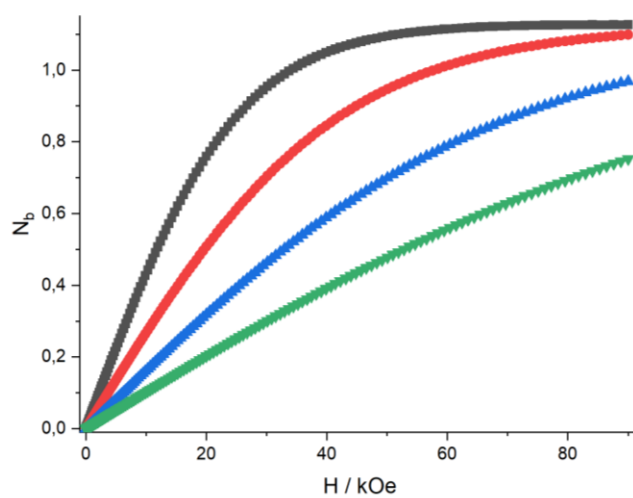

Figure S6. Isothermal magnetization at 1.8 (■), 3 (●), 5 (▲) and 13 K (△) for **1**.

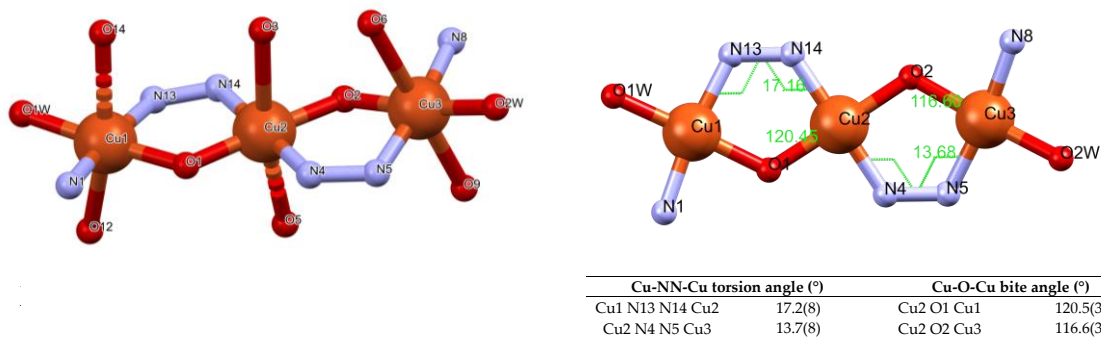

Figure S7. Atom label in Cu<sub>3</sub> central core; Cu-NN-Cu torsion angles in Cu<sub>3</sub> central core in **1**.

## 2. Additional crystallographic data

Table S1. Complete Data of refinement of 1.

Fractional Atomic Coordinates ( $\times 10^4$ ) and Equivalent Isotropic Displacement Parameters ( $\text{\AA}^2 \times 10^3$ ) for 1.  $U_{\text{eq}}$  is defined as 1/3 of the trace of the orthogonalised  $U_{ij}$  tensor.

| Atom | x           | y           | z           | U(eq)     |
|------|-------------|-------------|-------------|-----------|
| Cu1  | 2251.5 (16) | 6405.9 (7)  | 2675.8 (7)  | 31.1 (3)  |
| Cu2  | 2601.5 (15) | 7579.9 (7)  | 4777.9 (6)  | 25.0 (3)  |
| Cu3  | 2487.6 (15) | 8694.4 (7)  | 6817.9 (6)  | 28.0 (3)  |
| O1W  | 1766 (10)   | 6373 (5)    | 1485 (4)    | 45.0 (17) |
| O1   | 2493 (8)    | 6392 (4)    | 3829 (4)    | 30.5 (14) |
| O2   | 2830 (8)    | 8807 (4)    | 5748 (3)    | 24.2 (12) |
| O2W  | 1867 (10)   | 8630 (5)    | 7888 (4)    | 42.0 (16) |
| N1   | 1834 (11)   | 4994 (5)    | 2350 (4)    | 32.7 (17) |
| N2   | 1553 (15)   | 3420 (6)    | 1887 (6)    | 56 (3)    |
| N3   | 2771 (12)   | 5296 (5)    | 4568 (5)    | 36.2 (19) |
| N4   | 2716 (10)   | 6864 (5)    | 5529 (4)    | 27.7 (16) |
| N5   | 2914 (10)   | 7322 (5)    | 6417 (4)    | 29.2 (16) |
| N6   | 3610 (14)   | 6750 (6)    | 7560 (5)    | 52 (2)    |
| N7   | 3283 (11)   | 5782 (5)    | 6097 (4)    | 30.4 (17) |
| N8   | 2024 (11)   | 10040 (5)   | 7069 (4)    | 32.4 (17) |
| N9   | 1750 (11)   | 11582 (5)   | 7492 (5)    | 37.9 (19) |
| N10  | 2785 (11)   | 9903 (5)    | 5006 (4)    | 31.2 (17) |
| N11  | 3171 (11)   | 9446 (5)    | 3543 (4)    | 31.0 (17) |
| N12  | 3475 (13)   | 8464 (6)    | 2146 (5)    | 49 (2)    |
| N13  | 2663 (10)   | 7856 (5)    | 3169 (4)    | 27.8 (16) |
| N14  | 2510 (10)   | 8297 (5)    | 4016 (4)    | 27.3 (16) |
| C1   | 1692 (17)   | 4175 (7)    | 1685 (7)    | 51 (3)    |
| C2   | 1557 (17)   | 3716 (7)    | 2733 (6)    | 51 (3)    |
| C3   | 1720 (13)   | 4706 (6)    | 3016 (5)    | 31 (2)    |
| C4   | 1687 (13)   | 5498 (6)    | 3854 (6)    | 31 (2)    |
| C5   | 2880 (12)   | 5944 (6)    | 5356 (6)    | 29.5 (19) |
| C6   | 3265 (13)   | 6656 (6)    | 6741 (6)    | 32 (2)    |
| C7   | 1894 (14)   | 10816 (6)   | 7711 (6)    | 36 (2)    |
| C8   | 1787 (12)   | 11299 (6)   | 6636 (6)    | 31.0 (19) |
| C9   | 1924 (11)   | 10332 (6)   | 6374 (5)    | 27.2 (18) |
| C10  | 1927 (12)   | 9519 (5)    | 5550 (5)    | 25.8 (18) |
| C11  | 2811 (11)   | 9238 (6)    | 4229 (5)    | 23.9 (17) |
| C12  | 3087 (13)   | 8551 (6)    | 2910 (6)    | 35 (2)    |
| Cl1  | -2196 (3)   | 7543.9 (16) | 5282.6 (16) | 38.3 (6)  |
| O3   | -1063 (10)  | 7402 (6)    | 4656 (5)    | 54.8 (19) |
| O4   | -3035 (12)  | 6609 (6)    | 5216 (7)    | 77 (3)    |
| O5   | -3613 (11)  | 8098 (6)    | 5121 (6)    | 62 (2)    |
| O6   | -1036 (12)  | 8048 (8)    | 6112 (5)    | 86 (3)    |
| Cl2  | 6843 (4)    | 5893.4 (17) | 2375.0 (16) | 41.1 (6)  |
| O11  | 6924 (16)   | 5421 (8)    | 2948 (7)    | 100 (4)   |



**Fractional Atomic Coordinates ( $\times 10^4$ ) and Equivalent Isotropic Displacement Parameters ( $\text{\AA}^2 \times 10^3$ ) for 1.  $U_{eq}$  is defined as 1/3 of the trace of the orthogonalised  $U_{ij}$  tensor.**

| Atom | x          | y           | z           | U(eq)     |
|------|------------|-------------|-------------|-----------|
| O12  | 5573 (12)  | 6559 (7)    | 2536 (8)    | 93 (4)    |
| O13  | 6310 (20)  | 5178 (10)   | 1582 (7)    | 148 (6)   |
| O14  | 8619 (11)  | 6438 (6)    | 2515 (6)    | 71 (3)    |
| Cl3  | 7119 (4)   | 9219.0 (17) | 8171.8 (16) | 42.9 (6)  |
| O7   | 8330 (18)  | 10051 (8)   | 8653 (10)   | 140 (6)   |
| O8   | 5952 (16)  | 8966 (11)   | 8666 (7)    | 119 (4)   |
| O9   | 5868 (13)  | 9336 (7)    | 7472 (6)    | 81 (3)    |
| O10  | 8035 (15)  | 8418 (6)    | 7883 (7)    | 91 (3)    |
| Cl4  | 4078 (6)   | 7458 (3)    | 9912 (2)    | 85.4 (11) |
| O15  | 5120 (40)  | 6850 (20)   | 9360 (16)   | 103 (8)   |
| O17  | 4940 (50)  | 8280 (20)   | 10590 (20)  | 133 (10)  |
| O19  | 2910 (40)  | 7910 (20)   | 9340 (19)   | 135 (9)   |
| O22  | 4740 (30)  | 7118 (16)   | 10606 (14)  | 99 (7)    |
| O16  | 5500 (40)  | 7400 (20)   | 9432 (16)   | 108 (8)   |
| O18  | 3850 (40)  | 8500 (20)   | 10343 (18)  | 120 (9)   |
| O20  | 2470 (50)  | 6790 (20)   | 9330 (20)   | 150 (11)  |
| O21  | 2680 (60)  | 6930 (30)   | 10040 (30)  | 186 (15)  |
| O3W  | 3000 (20)  | 5040 (10)   | 196 (9)     | 141 (5)   |
| O4W  | -1250 (14) | 7006 (7)    | 833 (6)     | 84 (3)    |
| O5W  | 9380 (18)  | 8142 (8)    | 9848 (7)    | 113 (4)   |
| O6W  | 2875 (17)  | 10122 (8)   | 9451 (6)    | 102 (4)   |

**Anisotropic Displacement Parameters ( $\text{\AA}^2 \times 10^3$ ) for 1. The Anisotropic displacement factor exponent takes the form:  $-2\pi^2[h^2a^{*2}U_{11}+2hka^*b^*U_{12}+...]$ .**

| Atom | U <sub>11</sub> | U <sub>22</sub> | U <sub>33</sub> | U <sub>23</sub> | U <sub>13</sub> | U <sub>12</sub> |
|------|-----------------|-----------------|-----------------|-----------------|-----------------|-----------------|
| Cu1  | 41.0 (7)        | 26.4 (5)        | 28.9 (6)        | 11.6 (4)        | 11.5 (5)        | 7.2 (5)         |
| Cu2  | 32.7 (6)        | 19.2 (5)        | 28.0 (6)        | 12.6 (4)        | 10.3 (4)        | 6.7 (4)         |
| Cu3  | 33.0 (6)        | 25.9 (5)        | 29.6 (6)        | 13.3 (4)        | 10.7 (4)        | 7.1 (4)         |
| O1W  | 59 (5)          | 49 (4)          | 34 (4)          | 20 (3)          | 19 (3)          | 12 (3)          |
| O1   | 41 (4)          | 13 (3)          | 41 (4)          | 9 (2)           | 18 (3)          | 5 (2)           |
| O2   | 35 (3)          | 25 (3)          | 21 (3)          | 15 (2)          | 11 (2)          | 10 (2)          |
| O2W  | 51 (4)          | 46 (4)          | 43 (4)          | 23 (3)          | 28 (3)          | 14 (3)          |
| N1   | 44 (5)          | 20 (3)          | 31 (4)          | 8 (3)           | 4 (3)           | 3 (3)           |
| N2   | 88 (8)          | 28 (4)          | 52 (6)          | 11 (4)          | 22 (5)          | 13 (5)          |
| N3   | 58 (6)          | 21 (3)          | 37 (4)          | 18 (3)          | 11 (4)          | 11 (3)          |
| N4   | 36 (4)          | 20 (3)          | 25 (4)          | 2 (3)           | 10 (3)          | 8 (3)           |
| N5   | 39 (4)          | 28 (4)          | 25 (4)          | 13 (3)          | 10 (3)          | 10 (3)          |
| N6   | 89 (8)          | 42 (5)          | 32 (5)          | 25 (4)          | 8 (4)           | 14 (5)          |
| N7   | 46 (5)          | 22 (3)          | 28 (4)          | 15 (3)          | 7 (3)           | 10 (3)          |
| N8   | 42 (5)          | 31 (4)          | 28 (4)          | 14 (3)          | 7 (3)           | 8 (3)           |
| N9   | 45 (5)          | 25 (4)          | 41 (5)          | 6 (3)           | 13 (4)          | 10 (3)          |
| N10  | 40 (5)          | 20 (3)          | 35 (4)          | 12 (3)          | 11 (3)          | -2 (3)          |

**Anisotropic Displacement Parameters ( $\text{\AA}^2 \times 10^3$ ) for 1. The Anisotropic displacement factor exponent takes the form:  $-2\pi^2[h^2a^{*2}U_{11}+2hka^*b^*U_{12}+\dots]$ .**

| Atom | U <sub>11</sub> | U <sub>22</sub> | U <sub>33</sub> | U <sub>23</sub> | U <sub>13</sub> | U <sub>12</sub> |
|------|-----------------|-----------------|-----------------|-----------------|-----------------|-----------------|
| N11  | 42 (5)          | 26 (4)          | 35 (4)          | 18 (3)          | 16 (3)          | 3 (3)           |
| N12  | 74 (7)          | 51 (5)          | 32 (4)          | 21 (4)          | 20 (4)          | 17 (5)          |
| N13  | 38 (4)          | 24 (3)          | 29 (4)          | 17 (3)          | 9 (3)           | 9 (3)           |
| N14  | 25 (4)          | 34 (4)          | 26 (4)          | 16 (3)          | 4 (3)           | 3 (3)           |
| C1   | 73 (8)          | 36 (5)          | 47 (6)          | 13 (5)          | 18 (5)          | 17 (5)          |
| C2   | 83 (9)          | 31 (5)          | 35 (6)          | 10 (4)          | 10 (5)          | 1 (5)           |
| C3   | 37 (5)          | 24 (4)          | 32 (5)          | 10 (4)          | 4 (4)           | 4 (4)           |
| C4   | 28 (5)          | 30 (4)          | 41 (5)          | 18 (4)          | 13 (4)          | -1 (4)          |
| C5   | 27 (5)          | 26 (4)          | 40 (5)          | 16 (4)          | 10 (4)          | 5 (4)           |
| C6   | 33 (5)          | 22 (4)          | 40 (5)          | 13 (4)          | 6 (4)           | 1 (4)           |
| C7   | 50 (6)          | 30 (5)          | 35 (5)          | 13 (4)          | 20 (4)          | 11 (4)          |
| C8   | 27 (5)          | 30 (4)          | 34 (5)          | 12 (4)          | 4 (4)           | 0 (4)           |
| C9   | 16 (4)          | 31 (4)          | 34 (5)          | 11 (4)          | 6 (3)           | 4 (3)           |
| C10  | 31 (5)          | 19 (4)          | 30 (5)          | 11 (3)          | 8 (4)           | 7 (3)           |
| C11  | 17 (4)          | 29 (4)          | 35 (5)          | 21 (4)          | 10 (3)          | 6 (3)           |
| C12  | 40 (6)          | 32 (5)          | 33 (5)          | 14 (4)          | 10 (4)          | 1 (4)           |
| Cl1  | 26.2 (12)       | 39.1 (12)       | 56.2 (15)       | 26.4 (11)       | 8.4 (10)        | 2.7 (9)         |
| O3   | 40 (4)          | 74 (5)          | 59 (5)          | 31 (4)          | 16 (4)          | 14 (4)          |
| O4   | 55 (5)          | 54 (5)          | 150 (9)         | 73 (6)          | 21 (5)          | 5 (4)           |
| O5   | 45 (5)          | 58 (5)          | 108 (7)         | 53 (5)          | 25 (4)          | 24 (4)          |
| O6   | 50 (5)          | 141 (9)         | 50 (5)          | 23 (5)          | 10 (4)          | -17 (6)         |
| Cl2  | 42.7 (15)       | 33.0 (12)       | 51.3 (15)       | 18.9 (11)       | 12.8 (11)       | 5.5 (10)        |
| O11  | 113 (9)         | 106 (8)         | 111 (8)         | 89 (7)          | 12 (7)          | -3 (7)          |
| O12  | 35 (5)          | 66 (6)          | 197 (11)        | 67 (7)          | 31 (6)          | 12 (4)          |
| O13  | 182 (14)        | 130 (10)        | 67 (7)          | -33 (7)         | 29 (8)          | -31 (10)        |
| O14  | 40 (5)          | 51 (5)          | 139 (8)         | 45 (5)          | 41 (5)          | 11 (4)          |
| Cl3  | 40.6 (14)       | 38.2 (12)       | 51.9 (15)       | 18.0 (11)       | 10.6 (11)       | 10.1 (11)       |
| O7   | 104 (10)        | 68 (7)          | 198 (14)        | 40 (8)          | -56 (9)         | -19 (6)         |
| O8   | 88 (8)          | 209 (14)        | 95 (8)          | 85 (9)          | 41 (7)          | 31 (9)          |
| O9   | 70 (6)          | 83 (6)          | 95 (7)          | 59 (6)          | -13 (5)         | -7 (5)          |
| O10  | 107 (8)         | 53 (5)          | 122 (8)         | 31 (5)          | 39 (7)          | 38 (5)          |
| Cl4  | 98 (3)          | 98 (3)          | 52 (2)          | 15.6 (19)       | 25.2 (19)       | 0 (2)           |
| O3W  | 175 (14)        | 115 (10)        | 146 (12)        | 28 (9)          | 102 (11)        | 23 (9)          |
| O4W  | 98 (8)          | 83 (6)          | 71 (6)          | 26 (5)          | 17 (5)          | 38 (6)          |
| O5W  | 118 (10)        | 93 (8)          | 102 (8)         | 12 (7)          | 1 (7)           | 26 (7)          |
| O6W  | 126 (10)        | 121 (9)         | 43 (5)          | 13 (5)          | 6 (5)           | 30 (7)          |

**Bond Lengths for 1.**

| Atom | Atom             | Length/ $\text{\AA}$ | Atom | Atom | Length/ $\text{\AA}$ |
|------|------------------|----------------------|------|------|----------------------|
| Cu1  | Cu1 <sup>1</sup> | 7.4052 (9)           | N9   | C7   | 1.312 (11)           |
| Cu1  | Cu2              | 3.3635 (14)          | N9   | C8   | 1.384 (11)           |
| Cu1  | O1W              | 1.991 (6)            | N10  | C10  | 1.456 (11)           |

**Bond Lengths for 1.**

| Atom | Atom             | Length/Å    | Atom | Atom             | Length/Å   |
|------|------------------|-------------|------|------------------|------------|
| Cu1  | O1               | 1.960 (6)   | N10  | C11              | 1.356 (10) |
| Cu1  | N1               | 1.939 (7)   | N11  | C11              | 1.377 (10) |
| Cu1  | N13              | 1.979 (7)   | N11  | C12              | 1.375 (11) |
| Cu1  | O12              | 2.514 (9)   | N12  | C12              | 1.356 (12) |
| Cu2  | Cu2 <sup>1</sup> | 7.4052 (9)  | N13  | N14              | 1.400 (9)  |
| Cu2  | Cu3 <sup>1</sup> | 7.3084 (17) | N13  | C12              | 1.287 (11) |
| Cu2  | Cu3              | 3.3284 (14) | N14  | C11              | 1.293 (10) |
| Cu2  | O1               | 1.915 (5)   | C2   | C3               | 1.354 (12) |
| Cu2  | O2               | 1.955 (5)   | C3   | C4               | 1.509 (12) |
| Cu2  | N4               | 1.921 (7)   | C8   | C9               | 1.354 (11) |
| Cu2  | N14              | 1.939 (7)   | C9   | C10              | 1.502 (11) |
| Cu2  | O3               | 2.669 (7)   | Cl1  | O3               | 1.449 (8)  |
| Cu2  | O5 <sup>1</sup>  | 2.747 (8)   | Cl1  | O4               | 1.423 (7)  |
| Cu3  | O2               | 1.957 (5)   | Cl1  | O5               | 1.424 (7)  |
| Cu3  | O2W              | 2.002 (6)   | Cl1  | O6               | 1.427 (9)  |
| Cu3  | N5               | 1.966 (7)   | Cl2  | O11              | 1.382 (8)  |
| Cu3  | N8               | 1.946 (7)   | Cl2  | O12              | 1.403 (9)  |
| Cu3  | O6               | 2.617 (9)   | Cl2  | O13              | 1.364 (10) |
| Cu3  | O9               | 2.510 (9)   | Cl2  | O14              | 1.421 (8)  |
| O1   | C4               | 1.419 (10)  | O14  | Cu1 <sup>1</sup> | 2.660 (8)  |
| O2   | C10              | 1.390 (9)   | Cl3  | O7               | 1.359 (10) |
| N1   | C1               | 1.321 (12)  | Cl3  | O8               | 1.427 (11) |
| N1   | C3               | 1.363 (11)  | Cl3  | O9               | 1.446 (8)  |
| N2   | C1               | 1.274 (13)  | Cl3  | O10              | 1.391 (9)  |
| N2   | C2               | 1.363 (13)  | Cl4  | O15              | 1.44 (3)   |
| N3   | C4               | 1.473 (11)  | Cl4  | O17              | 1.36 (3)   |
| N3   | C5               | 1.341 (11)  | Cl4  | O19              | 1.55 (3)   |
| N4   | N5               | 1.409 (9)   | Cl4  | O22              | 1.46 (2)   |
| N4   | C5               | 1.303 (10)  | Cl4  | O16              | 1.44 (3)   |
| N5   | C6               | 1.305 (10)  | Cl4  | O18              | 1.49 (3)   |
| N6   | C6               | 1.336 (12)  | Cl4  | O20              | 1.45 (3)   |
| N7   | C5               | 1.357 (11)  | Cl4  | O21              | 1.34 (4)   |
| N7   | C6               | 1.377 (10)  | O17  | O22              | 1.71 (4)   |
| N8   | C7               | 1.308 (11)  | O20  | O21              | 1.15 (4)   |
| N8   | C9               | 1.394 (11)  |      |                  |            |

<sup>1</sup>1+X,+Y,+Z**Bond Angles for 1.**

| Atom | Atom | Atom             | Angle/°   | Atom | Atom | Atom | Angle/°   |
|------|------|------------------|-----------|------|------|------|-----------|
| Cu2  | Cu1  | Cu1 <sup>1</sup> | 99.01 (3) | C10  | O2   | Cu3  | 113.7 (5) |
| O1W  | Cu1  | Cu1 <sup>1</sup> | 89.6 (2)  | C1   | N1   | Cu1  | 141.3 (7) |
| O1W  | Cu1  | Cu2              | 151.3 (2) | C1   | N1   | C3   | 105.4 (8) |

# **Bond Angles for 1.**

| Atom             | Atom | Atom             | Angle/°     | Atom | Atom | Atom | Angle/°    |
|------------------|------|------------------|-------------|------|------|------|------------|
| O1W              | Cu1  | O12              | 82.4 (4)    | C3   | N1   | Cu1  | 113.2 (5)  |
| O1               | Cu1  | Cu1 <sup>1</sup> | 95.19 (18)  | C1   | N2   | C2   | 108.7 (9)  |
| O1               | Cu1  | Cu2              | 29.39 (15)  | C5   | N3   | C4   | 117.1 (7)  |
| O1               | Cu1  | O1W              | 174.9 (3)   | N5   | N4   | Cu2  | 122.9 (5)  |
| O1               | Cu1  | N13              | 89.1 (2)    | C5   | N4   | Cu2  | 128.2 (6)  |
| O1               | Cu1  | O12              | 102.5 (3)   | C5   | N4   | N5   | 108.3 (7)  |
| N1               | Cu1  | Cu1 <sup>1</sup> | 91.4 (2)    | N4   | N5   | Cu3  | 115.5 (5)  |
| N1               | Cu1  | Cu2              | 112.0 (2)   | C6   | N5   | Cu3  | 137.8 (6)  |
| N1               | Cu1  | O1W              | 95.0 (3)    | C6   | N5   | N4   | 106.5 (6)  |
| N1               | Cu1  | O1               | 83.0 (3)    | C5   | N7   | C6   | 106.5 (7)  |
| N1               | Cu1  | N13              | 172.1 (3)   | C7   | N8   | Cu3  | 140.5 (6)  |
| N1               | Cu1  | O12              | 96.9 (3)    | C7   | N8   | C9   | 105.9 (7)  |
| N13              | Cu1  | Cu1 <sup>1</sup> | 90.4 (2)    | C9   | N8   | Cu3  | 113.3 (5)  |
| N13              | Cu1  | Cu2              | 60.12 (19)  | C7   | N9   | C8   | 108.1 (7)  |
| N13              | Cu1  | O1W              | 92.7 (3)    | C11  | N10  | C10  | 115.5 (6)  |
| N13              | Cu1  | O12              | 85.8 (3)    | C12  | N11  | C11  | 105.4 (7)  |
| O12              | Cu1  | Cu1 <sup>1</sup> | 8.7 (2)     | N14  | N13  | Cu1  | 116.9 (5)  |
| O12              | Cu1  | Cu2              | 103.0 (3)   | C12  | N13  | Cu1  | 135.9 (6)  |
| Cu1              | Cu2  | Cu2 <sup>1</sup> | 80.99 (3)   | C12  | N13  | N14  | 107.2 (7)  |
| Cu1              | Cu2  | Cu3 <sup>1</sup> | 107.13 (3)  | N13  | N14  | Cu2  | 122.0 (5)  |
| Cu3              | Cu2  | Cu1              | 174.28 (4)  | C11  | N14  | Cu2  | 127.0 (6)  |
| Cu3              | Cu2  | Cu2 <sup>1</sup> | 104.69 (3)  | C11  | N14  | N13  | 108.4 (6)  |
| Cu3 <sup>1</sup> | Cu2  | Cu2 <sup>1</sup> | 26.137 (12) | N2   | C1   | N1   | 111.9 (10) |
| Cu3              | Cu2  | Cu3 <sup>1</sup> | 78.55 (3)   | C3   | C2   | N2   | 105.5 (9)  |
| O1               | Cu2  | Cu1              | 30.15 (17)  | N1   | C3   | C4   | 116.9 (7)  |
| O1               | Cu2  | Cu2 <sup>1</sup> | 79.49 (19)  | C2   | C3   | N1   | 108.4 (8)  |
| O1               | Cu2  | Cu3              | 149.28 (17) | C2   | C3   | C4   | 134.5 (9)  |
| O1               | Cu2  | Cu3 <sup>1</sup> | 101.92 (19) | O1   | C4   | N3   | 110.2 (7)  |
| O1               | Cu2  | O2               | 177.4 (3)   | O1   | C4   | C3   | 106.6 (7)  |
| O1               | Cu2  | N4               | 90.4 (3)    | N3   | C4   | C3   | 110.2 (7)  |
| O1               | Cu2  | N14              | 89.3 (3)    | N3   | C5   | N7   | 126.9 (7)  |
| O1               | Cu2  | O3               | 94.8 (2)    | N4   | C5   | N3   | 123.9 (8)  |
| O1               | Cu2  | O5 <sup>1</sup>  | 95.6 (3)    | N4   | C5   | N7   | 109.0 (7)  |
| O2               | Cu2  | Cu1              | 149.31 (15) | N5   | C6   | N6   | 128.5 (8)  |
| O2               | Cu2  | Cu2 <sup>1</sup> | 97.99 (17)  | N5   | C6   | N7   | 109.5 (8)  |
| O2               | Cu2  | Cu3              | 31.73 (15)  | N6   | C6   | N7   | 122.0 (8)  |
| O2               | Cu2  | Cu3 <sup>1</sup> | 75.73 (17)  | N8   | C7   | N9   | 111.8 (8)  |
| O2               | Cu2  | O3               | 87.7 (2)    | C9   | C8   | N9   | 105.6 (8)  |
| O2               | Cu2  | O5 <sup>1</sup>  | 81.9 (2)    | N8   | C9   | C10  | 114.2 (7)  |
| N4               | Cu2  | Cu1              | 120.54 (19) | C8   | C9   | N8   | 108.6 (7)  |
| N4               | Cu2  | Cu2 <sup>1</sup> | 92.0 (2)    | C8   | C9   | C10  | 137.2 (8)  |
| N4               | Cu2  | Cu3              | 59.30 (18)  | O2   | C10  | N10  | 113.1 (7)  |
| N4               | Cu2  | Cu3 <sup>1</sup> | 78.6 (2)    | O2   | C10  | C9   | 107.7 (7)  |
| N4               | Cu2  | O2               | 90.1 (2)    | N10  | C10  | C9   | 110.2 (7)  |

# **Bond Angles for 1.**

| Atom            | Atom | Atom             | Angle/°     | Atom | Atom | Atom             | Angle/°    |
|-----------------|------|------------------|-------------|------|------|------------------|------------|
| N4              | Cu2  | N14              | 179.4 (3)   | N10  | C11  | N11              | 126.1 (7)  |
| N4              | Cu2  | O3               | 87.4 (3)    | N14  | C11  | N10              | 125.0 (7)  |
| N4              | Cu2  | O5 <sup>1</sup>  | 94.0 (3)    | N14  | C11  | N11              | 108.9 (7)  |
| N14             | Cu2  | Cu1              | 59.2 (2)    | N12  | C12  | N11              | 122.3 (8)  |
| N14             | Cu2  | Cu2 <sup>1</sup> | 87.5 (2)    | N13  | C12  | N11              | 110.1 (8)  |
| N14             | Cu2  | Cu3 <sup>1</sup> | 101.0 (2)   | N13  | C12  | N12              | 127.6 (8)  |
| N14             | Cu2  | Cu3              | 121.1 (2)   | O4   | Cl1  | O3               | 108.6 (6)  |
| N14             | Cu2  | O2               | 90.2 (3)    | O4   | Cl1  | O5               | 109.2 (5)  |
| N14             | Cu2  | O3               | 93.1 (3)    | O4   | Cl1  | O6               | 110.2 (6)  |
| N14             | Cu2  | O5 <sup>1</sup>  | 85.5 (3)    | O5   | Cl1  | O3               | 109.9 (5)  |
| O3              | Cu2  | Cu1              | 94.42 (16)  | O5   | Cl1  | O6               | 110.2 (6)  |
| O3              | Cu2  | Cu2 <sup>1</sup> | 174.27 (17) | O6   | Cl1  | O3               | 108.8 (5)  |
| O3              | Cu2  | Cu3              | 79.87 (16)  | Cl1  | O3   | Cu2              | 132.9 (4)  |
| O3              | Cu2  | Cu3 <sup>1</sup> | 158.14 (16) | Cl1  | O6   | Cu3              | 138.9 (5)  |
| O3              | Cu2  | O5 <sup>1</sup>  | 169.5 (2)   | O11  | Cl2  | O12              | 108.8 (7)  |
| O5 <sup>1</sup> | Cu2  | Cu1              | 93.80 (19)  | O11  | Cl2  | O14              | 108.6 (6)  |
| O5 <sup>1</sup> | Cu2  | Cu2 <sup>1</sup> | 16.22 (17)  | O12  | Cl2  | O14              | 107.8 (5)  |
| O5 <sup>1</sup> | Cu2  | Cu3              | 91.90 (19)  | O13  | Cl2  | O11              | 106.3 (9)  |
| O5 <sup>1</sup> | Cu2  | Cu3 <sup>1</sup> | 16.71 (18)  | O13  | Cl2  | O12              | 112.4 (9)  |
| O2              | Cu3  | Cu2              | 31.68 (15)  | O13  | Cl2  | O14              | 112.8 (8)  |
| O2              | Cu3  | O2W              | 173.7 (3)   | Cl2  | O12  | Cu1              | 133.6 (5)  |
| O2              | Cu3  | N5               | 91.0 (2)    | Cl2  | O14  | Cu1 <sup>1</sup> | 146.4 (5)  |
| O2              | Cu3  | O6               | 88.8 (3)    | O7   | Cl3  | O8               | 110.7 (9)  |
| O2              | Cu3  | O9               | 90.0 (3)    | O7   | Cl3  | O9               | 112.2 (7)  |
| O2W             | Cu3  | Cu2              | 149.7 (2)   | O7   | Cl3  | O10              | 111.7 (8)  |
| O2W             | Cu3  | O6               | 86.2 (3)    | O8   | Cl3  | O9               | 105.3 (7)  |
| O2W             | Cu3  | O9               | 94.9 (3)    | O10  | Cl3  | O8               | 105.4 (7)  |
| N5              | Cu3  | Cu2              | 61.1 (2)    | O10  | Cl3  | O9               | 111.2 (7)  |
| N5              | Cu3  | O2W              | 92.7 (3)    | Cl3  | O9   | Cu3              | 131.6 (5)  |
| N5              | Cu3  | O6               | 87.6 (3)    | O15  | Cl4  | O19              | 103.9 (15) |
| N5              | Cu3  | O9               | 93.0 (3)    | O15  | Cl4  | O22              | 93.1 (14)  |
| N8              | Cu3  | Cu2              | 111.9 (2)   | O17  | Cl4  | O15              | 120.8 (18) |
| N8              | Cu3  | O2               | 82.2 (3)    | O17  | Cl4  | O19              | 100.8 (18) |
| N8              | Cu3  | O2W              | 93.9 (3)    | O17  | Cl4  | O22              | 74.7 (15)  |
| N8              | Cu3  | N5               | 173.0 (3)   | O22  | Cl4  | O19              | 162.0 (15) |
| N8              | Cu3  | O6               | 90.4 (4)    | O16  | Cl4  | O18              | 110.6 (16) |
| N8              | Cu3  | O9               | 88.9 (3)    | O16  | Cl4  | O20              | 105.7 (18) |
| O6              | Cu3  | Cu2              | 78.25 (19)  | O20  | Cl4  | O18              | 117.7 (18) |
| O9              | Cu3  | Cu2              | 101.0 (2)   | O21  | Cl4  | O16              | 144 (2)    |
| O9              | Cu3  | O6               | 178.7 (3)   | O21  | Cl4  | O18              | 105 (2)    |
| Cu2             | O1   | Cu1              | 120.5 (3)   | O21  | Cl4  | O20              | 48.4 (18)  |
| C4              | O1   | Cu1              | 114.1 (5)   | Cl4  | O17  | O22              | 55.5 (14)  |
| C4              | O1   | Cu2              | 118.5 (5)   | Cl4  | O22  | O17              | 49.8 (13)  |
| Cu2             | O2   | Cu3              | 116.6 (3)   | O21  | O20  | Cl4              | 61 (3)     |

**Bond Angles for 1.**

| Atom | Atom | Atom | Angle/°   | Atom | Atom | Atom | Angle/° |
|------|------|------|-----------|------|------|------|---------|
| C10  | O2   | Cu2  | 114.2 (5) | O20  | O21  | Cl4  | 71 (3)  |

<sup>1</sup>I+X,+Y,+Z**Hydrogen Bonds for 1.**

| D  | H   | A               | d(D-H)/Å | d(H-A)/Å | d(D-A)/Å   | D-H-A/° |
|----|-----|-----------------|----------|----------|------------|---------|
| N7 | H7O | I1 <sup>1</sup> | 0.86     | 2.14     | 2.811 (11) | 134.0   |

<sup>1</sup>I-X,I-Y,I-Z**Torsion Angles for 1.**

| A   | B   | C   | D   | Angle/°    | A   | B   | C   | D   | Angle/°    |
|-----|-----|-----|-----|------------|-----|-----|-----|-----|------------|
| Cu1 | O1  | C4  | N3  | 146.2 (5)  | C4  | N3  | C5  | N7  | 158.4 (8)  |
| Cu1 | O1  | C4  | C3  | 26.6 (8)   | C5  | N3  | C4  | O1  | 62.1 (10)  |
| Cu1 | N1  | C1  | N2  | 174.4 (8)  | C5  | N3  | C4  | C3  | 179.5 (8)  |
| Cu1 | N1  | C3  | C2  | -175.9 (7) | C5  | N4  | N5  | Cu3 | -174.6 (6) |
| Cu1 | N1  | C3  | C4  | 7.5 (10)   | C5  | N4  | N5  | C6  | 2.5 (10)   |
| Cu1 | N13 | N14 | Cu2 | 17.2 (8)   | C5  | N7  | C6  | N5  | -1.4 (10)  |
| Cu1 | N13 | N14 | C11 | -179.7 (5) | C5  | N7  | C6  | N6  | 179.9 (9)  |
| Cu1 | N13 | C12 | N11 | 179.4 (6)  | C6  | N7  | C5  | N3  | 179.2 (9)  |
| Cu1 | N13 | C12 | N12 | -2.8 (17)  | C6  | N7  | C5  | N4  | 3.0 (10)   |
| Cu2 | O1  | C4  | N3  | -62.7 (8)  | C7  | N8  | C9  | C8  | 1.7 (10)   |
| Cu2 | O1  | C4  | C3  | 177.7 (5)  | C7  | N8  | C9  | C10 | -176.3 (8) |
| Cu2 | O2  | C10 | N10 | -68.4 (8)  | C7  | N9  | C8  | C9  | 1.1 (10)   |
| Cu2 | O2  | C10 | C9  | 169.7 (5)  | C8  | N9  | C7  | N8  | 0.0 (12)   |
| Cu2 | N4  | N5  | Cu3 | 13.7 (8)   | C8  | C9  | C10 | O2  | 156.7 (10) |
| Cu2 | N4  | N5  | C6  | -169.2 (6) | C8  | C9  | C10 | N10 | 32.9 (14)  |
| Cu2 | N4  | C5  | N3  | -8.6 (13)  | C9  | N8  | C7  | N9  | -1.0 (11)  |
| Cu2 | N4  | C5  | N7  | 167.7 (6)  | C10 | N10 | C11 | N11 | 165.2 (8)  |
| Cu2 | N14 | C11 | N10 | -17.7 (12) | C10 | N10 | C11 | N14 | -15.3 (12) |
| Cu2 | N14 | C11 | N11 | 161.9 (6)  | C11 | N10 | C10 | O2  | 61.5 (10)  |
| Cu3 | O2  | C10 | N10 | 154.5 (5)  | C11 | N10 | C10 | C9  | -177.9 (7) |
| Cu3 | O2  | C10 | C9  | 32.5 (8)   | C11 | N11 | C12 | N12 | -176.2 (9) |
| Cu3 | N5  | C6  | N6  | -5.9 (17)  | C11 | N11 | C12 | N13 | 1.7 (10)   |
| Cu3 | N5  | C6  | N7  | 175.5 (7)  | C12 | N11 | C11 | N10 | 178.6 (8)  |
| Cu3 | N8  | C7  | N9  | 172.7 (8)  | C12 | N11 | C11 | N14 | -0.9 (10)  |
| Cu3 | N8  | C9  | C8  | -174.0 (6) | C12 | N13 | N14 | Cu2 | -161.9 (6) |
| Cu3 | N8  | C9  | C10 | 8.1 (9)    | C12 | N13 | N14 | C11 | 1.2 (10)   |
| N1  | C3  | C4  | O1  | -22.1 (11) | O3  | Cl1 | O6  | Cu3 | -4.0 (12)  |
| N1  | C3  | C4  | N3  | -141.8 (8) | O4  | Cl1 | O3  | Cu2 | -106.6 (7) |
| N2  | C2  | C3  | N1  | -0.7 (13)  | O4  | Cl1 | O6  | Cu3 | 114.9 (10) |

**Torsion Angles for 1.**

| A   | B   | C   | D   | Angle/°    | A   | B   | C   | D                | Angle/°     |
|-----|-----|-----|-----|------------|-----|-----|-----|------------------|-------------|
| N2  | C2  | C3  | C4  | 175.1 (10) | O5  | Cl1 | O3  | Cu2              | 134.1 (6)   |
| N4  | N5  | C6  | N6  | 178.0 (10) | O5  | Cl1 | O6  | Cu3              | -124.5 (9)  |
| N4  | N5  | C6  | N7  | -0.6 (10)  | O6  | Cl1 | O3  | Cu2              | 13.3 (8)    |
| N5  | N4  | C5  | N3  | -179.7 (8) | O11 | Cl2 | O12 | Cu1              | -52.4 (11)  |
| N5  | N4  | C5  | N7  | -3.4 (10)  | O11 | Cl2 | O14 | Cu1 <sup>1</sup> | 51.9 (13)   |
| N8  | C9  | C10 | O2  | -26.1 (10) | O12 | Cl2 | O14 | Cu1 <sup>1</sup> | 169.6 (10)  |
| N8  | C9  | C10 | N10 | -149.8 (7) | O13 | Cl2 | O12 | Cu1              | 65.1 (12)   |
| N9  | C8  | C9  | N8  | -1.7 (10)  | O13 | Cl2 | O14 | Cu1 <sup>1</sup> | -65.7 (14)  |
| N9  | C8  | C9  | C10 | 175.6 (10) | O14 | Cl2 | O12 | Cu1              | -170.0 (8)  |
| N13 | N14 | C11 | N10 | -179.7 (8) | O7  | Cl3 | O9  | Cu3              | -142.2 (10) |
| N13 | N14 | C11 | N11 | -0.1 (9)   | O8  | Cl3 | O9  | Cu3              | -21.8 (10)  |
| N14 | N13 | C12 | N11 | -1.8 (10)  | O10 | Cl3 | O9  | Cu3              | 91.9 (9)    |
| N14 | N13 | C12 | N12 | 176.0 (10) | O15 | Cl4 | O17 | O22              | -84.4 (18)  |
| C1  | N1  | C3  | C2  | 1.5 (12)   | O15 | Cl4 | O22 | O17              | 121.2 (19)  |
| C1  | N1  | C3  | C4  | -175.2 (9) | O19 | Cl4 | O17 | O22              | 162.1 (15)  |
| C1  | N2  | C2  | C3  | -0.3 (14)  | O19 | Cl4 | O22 | O17              | -78 (5)     |
| C2  | N2  | C1  | N1  | 1.3 (15)   | O16 | Cl4 | O20 | O21              | 151 (3)     |
| C2  | C3  | C4  | O1  | 162.3 (12) | O16 | Cl4 | O21 | O20              | -53 (5)     |
| C2  | C3  | C4  | N3  | 42.7 (15)  | O18 | Cl4 | O20 | O21              | -85 (3)     |
| C3  | N1  | C1  | N2  | -1.7 (13)  | O18 | Cl4 | O21 | O20              | 114 (3)     |
| C4  | N3  | C5  | N4  | -25.9 (13) |     |     |     |                  |             |

<sup>1</sup>1+X,+Y,+Z**Hydrogen Atom Coordinates (Å×10<sup>4</sup>) and Isotropic Displacement Parameters (Å<sup>2</sup>×10<sup>3</sup>) for 1.**

| Atom | x    | y     | z    | U(eq) |
|------|------|-------|------|-------|
| H2   | 1471 | 2824  | 1545 | 67    |
| H3   | 3311 | 4784  | 4483 | 43    |
| H6A  | 3846 | 6180  | 7716 | 62    |
| H6B  | 3627 | 7389  | 8008 | 62    |
| H7   | 3506 | 5240  | 6152 | 36    |
| H9   | 1649 | 12160 | 7822 | 45    |
| H10  | 3245 | 10511 | 5166 | 37    |
| H11  | 3399 | 10016 | 3517 | 37    |
| H12A | 3295 | 7850  | 1819 | 59    |
| H12B | 2746 | 8769  | 1904 | 59    |
| H1   | 1694 | 4152  | 1136 | 62    |
| H2A  | 1468 | 3320  | 3050 | 62    |
| H4   | 402  | 5535  | 3916 | 38    |
| H7A  | 1902 | 10825 | 8257 | 43    |
| H8   | 1730 | 11691 | 6311 | 37    |
| H10A | 637  | 9230  | 5255 | 31    |

**Atomic Occupancy for 1.**

| <b>Atom</b> | <b><i>Occupancy</i></b> | <b>Atom</b> | <b><i>Occupancy</i></b> | <b>Atom</b> | <b><i>Occupancy</i></b> |
|-------------|-------------------------|-------------|-------------------------|-------------|-------------------------|
| O15         | 0.5                     | O17         | 0.5                     | O19         | 0.5                     |
| O22         | 0.5                     | O16         | 0.5                     | O18         | 0.5                     |
| O20         | 0.5                     | O21         | 0.5                     |             |                         |
